## The RNA Virome of Echinoderms

Elliot W. Jackson<sup>1,2\*</sup>, Roland C. Wilhelm<sup>3</sup>, Daniel H. Buckley<sup>1,3</sup>, and Ian Hewson<sup>1</sup>

<sup>1</sup> Department of Microbiology, Cornell University, Ithaca NY USA

<sup>2</sup> Scripps Institution of Oceanography, University of California San Diego, La Jolla CA, USA

<sup>3</sup> School of Integrative Plant Science, Bradfield Hall, Cornell University, Ithaca, NY USA

\* Correspondence: [ewj34@cornell.edu](mailto:ewj34@cornell.edu); Tel.: +1-231-838-6042

**Key words:** Viral discovery, Echinodermata, Invertebrates, RNA Viruses

### Abstract:

Echinoderms are a phylum of marine invertebrates that include model organisms, keystone species, and animals commercially harvested for seafood. Despite their scientific, ecological, and economic importance, there is little known about the diversity of RNA viruses that infect echinoderms compared to other invertebrates. We screened over 900 transcriptomes and viral metagenomes to characterize the RNA virome of 38 echinoderm species from all five classes (Crinoidea, Holothuroidea, Asteroidea, Ophiuroidea and Echinoidea). We identified 347 viral genome fragments that were classified to genera and families within nine viral orders - *Picornavirales*, *Durnavirales*, *Martellivirales*, *Nodamuvirales*, *Reovirales*, *Amarillovirales*, *Ghabrivirales*, *Mononegavirales*, and *Hepelivirales*. We compared the relative viral representation across three life stages (embryo, larvae, adult) and characterized the gene content of contigs which encoded complete or near-complete genomes. The proportion of viral reads in a given transcriptome was not found to significantly differ between life stages though the majority of viral contigs were discovered from transcriptomes of adult tissue. This study illuminates the biodiversity of RNA viruses from echinoderms, revealing the occurrence of viral groups in natural populations.

## 30 **Introduction**

31           Metazoans harbor an enormous diversity and abundance of RNA viruses – a discovery  
32 that has reshaped our understanding of viral evolution through expanded viral-host associations,  
33 broadened phylogenetic diversity, and novel reconfigurations of genome architectures [1, 2].  
34 Newly discovered viruses often blur the boundaries between well-known viral groups. For  
35 example, prior to a recent expansion, the family *Flaviviridae* was typified by relatively uniform,  
36 monopartite genomes, having a single 10-12 kb-long open reading frame (ORF), and being  
37 vectored to mammals by arthropod. Metagenomics has led to the discovery of hundreds of novel  
38 flavivirus genomes, redefining the genomic properties of this viral family, and extending their  
39 host diversity beyond mammals [3–6]. To date, the exploration and systematization of  
40 invertebrate RNA viruses have been skewed towards terrestrial arthropods, mainly insects,  
41 leaving gaps in our understanding of the diversity, ecology, and evolution of RNA virus in other  
42 invertebrate groups [1, 7–12]. To help close this gap, we characterized the RNA virome of  
43 Echinodermata - a phylum of marine invertebrates that are globally distributed throughout  
44 Earth's oceans and represent an evolutionary crossroads in developmental biology as one of two  
45 phyla that are invertebrate deuterostomes.

46           Wildlife disease and aquaculture are the two primary areas of concern regarding the  
47 threat of viral outbreaks among echinoderms. Disease outbreaks of sea urchins and sea stars have  
48 been documented at local, regional, and continental scales since 1898 and have gone unresolved  
49 in regards to their etiology [13, 14]. Certain species of sea urchins and sea cucumbers are valued  
50 as seafood delicacies and the growing demands for these species in the seafood industry have led  
51 to a rise in aquaculture farming [15, 16]. Viral outbreaks pose a major concern for aquaculture  
52 operations [17, 18], yet little is known about the identity, let alone virulence, of viruses that

53 infect these animals [19–21]. Baseline knowledge of viruses present in wild populations can help  
54 determine the etiology of future outbreaks and discern pathogenic versus non-pathogenic agents,  
55 or those which may become more replicative under environmental stress. Thus, a census of viral  
56 diversity will improve our future response when viruses impact the economic or ecological  
57 function of echinoderms.

58 Parvoviruses - linear, single-stranded DNA viruses - are the best documented group  
59 known to infect echinoderms since the discovery of a densovirus in a sea urchin metagenome  
60 from Hawaii in 2014 [19]. Shortly after, another densovirus was found in various sea star species  
61 and was implicated as the causative pathogen of the 2013/2014 Sea Star Wasting Syndrome  
62 (SSWS) outbreak in the Northeast Pacific [22]. However, subsequent attempts to correlate  
63 densoviruses to SSWS have not produced any clear association with pathology or disease [21–  
64 26]. Regardless, this discovery prompted a series of investigations into the diversity, prevalence,  
65 and association of these viruses with sea stars and SSWS [21, 24–26]. To date, no RNA virus  
66 identified using -omic approaches has been proven to cause any pathology in echinoderms [21,  
67 27]. However, one clear line of evidence that has emerged from the accumulation of -omic data  
68 is that sea stars are infected by a diversity of viruses. We expect that they, and other  
69 echinoderms, will be host to a novel, undocumented diversity of RNA viruses.

70 Sequencing-based 'viromics' approaches have been the primary method for the discovery  
71 and characterization of echinoderm viruses. Other methods, like microscopy or culturing, are  
72 laborious and low throughput or hindered by the lack of available cell lines from aquatic  
73 invertebrates. All echinoderm virome studies, to date, have taken a viral metagenomic approach,  
74 where shotgun metagenomics is performed on encapsidated nucleic acids that have been  
75 enriched and selected for by chemical and/or nuclease treatment from size-filtered (<0.2 um)

76 tissue homogenates [19–22, 25–27]. Metatranscriptomes and transcriptomes are increasingly  
77 used for viral discovery and have not yet been applied to echinoderms [28–31]. In the context of  
78 a metazoan, a metatranscriptome refers to the sequencing of total RNA (with rRNA removed)  
79 generally from samples pooled at the population level (multiple individuals of a species), while a  
80 transcriptome is the sequencing of poly-A tailed mRNA (with rRNA removed) generally from an  
81 individual organism [28, 32]. RNA-seq studies generating metatranscriptomes are typically for  
82 the purpose of viral discovery as opposed to transcriptomes, which are created for the purpose of  
83 analyzing gene expression patterns of an organism. In this study, we analyzed over 900 publicly  
84 available transcriptomes from echinoderms to characterize the biodiversity and distribution of  
85 RNA viruses. Together with previously published RNA viral metagenomes (i.e. a population of  
86 genomes of RNA viruses), we conducted a systematic survey of RNA viruses associated with the  
87 five major classes (Crinoidea, Holothuroidea, Asteroidea, Ophiuroidea and Echinoidea) of  
88 Echinodermata.

## Methods

89 The following sections detail the processing of the short-read libraries used for viral  
90 discovery and the analyses performed on the viral sequences. The two sources of libraries were  
91 transcriptomes and RNA-based viral metagenomes derived from various echinoderm species and  
92 tissues. All libraries processed in this study were obtained from the NCBI's Short Read Archive  
93 (Table S1) and the assemblies generated from this study and the database used for viral  
94 discovery are accessible through the Open Science Foundation (<https://osf.io/JXUAM>).

### *Host transcriptomes and RNA-based viral metagenomes*

95  
96  
97 A total of 903 paired-end transcriptomes derived from the five classes of echinoderm  
98 hosts, including crinoid (n = 18; Crinoidea), sea cucumbers (n = 178; Holothuroidea), sea star (n  
99 = 179; Asteroidea), brittle star (n = 71; Ophiuroidea) and urchin (n = 457; Echinoidea). Raw

100 sequences were quality controlled using Trimmomatic [33], to clip adapters, and FastX [34], to  
101 discard reads with lengths < 50 nt and average quality scores < 30. Transcriptomes were then  
102 assembled using default parameters in Trinity (v2.1.1) [35]. Contigs less than 500 nt were  
103 discarded prior to viral annotation.

104 A total of 24 paired-end RNA viral metagenomes derived from sea cucumbers (n=3;  
105 Holothuroidea) and sea stars (n=21; Asteroidea) were also retrieved from the Short Read Archive  
106 (Table S1). Raw sequences were merged, trimmed to clip adapters and discard reads with  
107 average quality scores < 20, and normalized to an average read depth of 100 using BBtools [36].  
108 RNA viral metagenomes were assembled using Spades (v 3.11.1) with the -meta flag [37].  
109 Contigs less than 500 nt were discarded prior to viral annotation.

#### 110 *Virus discovery and annotation*

111  
112 We curated an RNA virus database for viral annotation. The database contained viral  
113 amino acid sequences from Shi et al 2016, Wu et al 2020 and Wolf et al 2020, and from the  
114 NCBI viral genome database after filtering for viral sequences from invertebrates and  
115 invertebrates/vertebrates [1, 29, 38]. Duplicated amino acid sequences were removed from the  
116 database using seqkit, yielding a total of 36,193 unique viral gene sequences. Echinoderm RNA  
117 viruses were then identified by querying transcriptome/RNA viral metagenome assemblies  
118 against the curated RNA viral database using DIAMOND BLASTx with the sensitivity  
119 parameter adjusted to 'very-sensitive' and an e-value cutoff of <  $10^{-20}$  [39]. Contigs with  
120 significant similarity based on the BLAST criteria above were manually inspected in Geneious  
121 Prime (v 2020.2.2), and queried against the NCBI non-redundant database using the default  
122 BLASTp parameters to verify the viral annotation and assign putative gene function. BLASTp  
123 results were also used to identify conserved protein domains. Genome illustrations were created

124 by exporting the sequence viewer from Geneious Prime (v 2020.2.2) into Adobe Illustrator  
125 (v25.4.1). Contigs with near identical matches to human and plant viruses and bacteriophage  
126 were removed. ORFs containing an RdRP domain were used for taxonomic placement. If a  
127 contig did not contain an RdRP sequence, a complete or partial ORF containing any conserved  
128 protein domain was chosen. Contigs that did not contain a conserved protein domain were  
129 removed from further analysis. Quality-filtered reads were mapped to viral contigs to obtain  
130 relative abundance information using BMap [40] using the ‘semiperfect’ flag which  
131 accommodated ambiguous bases (with equivalent results achieved with the ‘perfect’ flag).

### 132 *Network analysis and phylogenetics*

133  
134 The taxonomic relationships of all recovered viral sequences were first mapped using a  
135 network analysis. To place sequences into broad taxonomic groups, we downloaded amino acid  
136 sequences from the top NCBI BLASTp results for each of our recovered viral sequences. A  
137 network was built based on sequence similarity using the online EFI-EST portal with default  
138 settings (minimum length = 0, maximum length = 50,000, filter type = e-value  $\leq 10^{-5}$  [41]. Nodes  
139 represent individual viral sequences and edges are the degree of similarity based off BLASTp  
140 pairwise similarity scores using a minimum pairwise similarity of 35%. Clusters and singletons  
141 were removed from the network that did not contain any representative viral sequences with a  
142 RdRP sequence. The network was visualized in Cytoscape (v 3.8.2) using the ‘organic’ layout  
143 [42].

144 We further established the relatives of echinoderm RNA viruses based on RdRP  
145 phylogenies. Independent phylogenetic analyses were performed for viral orders using the type  
146 species designated by the International Committee on Taxonomy of Viruses. RdRP amino acid  
147 sequences were aligned using MAFFT [43] and phylogenies were inferred by a substitution

148 model selected by smart model selection in PhyML 3.0 with branch support determined by  
149 bootstrapping for 100 iterations [44]. The resulting phylogenetic tree was visualized and  
150 annotated using FigTree v1.4.4 [45]. The *Amarillovirales* phylogeny was created from the  
151 MAFFT alignment used in [46].

## 152 **Results**

153 We recovered a total of 347 viral contigs and 33 complete or near-complete genomes  
154 from the 927 short read libraries analyzed. A total of 259 viral contigs were recovered from  
155 transcriptomes, and 88 viral contigs from RNA viral metagenomes (Figure S1B). The mean viral  
156 contig length recovered from RNA viral metagenomes (mean  $\pm$  standard deviation:  $4,421 \pm 3077$   
157 nt) was greater than from transcriptomes ( $3,143 \pm 3102$  nt; Figure S1A), and the size of  
158 sequencing libraries was weakly correlated with viral read depth in transcriptome libraries ( $p =$   
159  $0.002$ , Pearson's  $r = 0.29$ ) but not in RNA viral metagenomic libraries ( $p = 0.82$ ,  $r = 0.05$ ; Figure  
160 S1C). On average the relative abundance of viral contigs as a proportion of total reads was low,  
161 (0.0085%), ranging from 0.000023% to 0.29% ( $x_{\square} = 0.0085\%$ ). The average percentage of viral  
162 reads in viral metagenomes ( $x_{\square} = 0.39\%$ ) was ~45-fold higher than transcriptomes. However,  
163 viral abundance was highly uneven in the viral metagenomes with the average dropping to  
164 0.07% (~8-fold higher than transcriptomes) after excluding the top three most abundant samples.

165 Viral sequences were recovered from 111 of the 903 transcriptomic libraries and from all  
166 five echinoderm classes (Figure 1). Sea cucumbers exhibited the highest prevalence of viral  
167 contigs among all echinoderm libraries (*i.e.*, individuals) screened, followed by sea urchins  
168 (10%, 45/457), and the highest proportion among transcriptomes screened (26%; 47/178) (Figure  
169 1A). The majority of viral contigs recovered from transcriptomes came from adult tissue (70%)  
170 compared to embryos (20%) or larvae (10%) (Figure 1B). Transcriptomes derived from  
171 echinoderms during their larval stage had a slightly higher proportion of viral reads in their

172 transcriptome ( $x^2 = 0.013\%$ ) than adults (0.0095%), and more than embryos (0.0034%; Figure  
173 1C), but these differences were not significant (Kruskal-Wallis, chi-squared 1.65, p-value= 0.80).

174 Over half of the viral contigs contained an RdRP sequence (186/347), with 96 of these  
175 containing a complete or partial capsid sequence. Most viral contigs (215) contained at least a  
176 partial capsid sequence, and 42 viral contigs contained another conserved viral domain such as a  
177 methyltransferase or an RNA helicase domain (Supplemental Table 2). The majority of viral  
178 contigs were taxonomically placed in the order *Picornavirales* (n= 235) (Figure 2). The  
179 recovered picornaviruses were distributed among a variety of families with the largest number  
180 related to *Marnaviridae*, followed by *Dicistroviridae*, and *Iflaviridae* (Figure 3). Several unique  
181 clades within *Picornavirales* were represented by complete or near-complete genomes and may  
182 represent novel viral families (Figure 2). The second highest number of viral contigs were  
183 recovered from *Mononegavirales* (n = 12), with the remainder spread among seven orders (n=  
184 20): *Durnavirales*, *Martellivirales*, *Nodamuvirales*, *Reovirales*, *Amarillovirales*, *Ghabrivirales*,  
185 and *Hepelivirales*. In general, the recovered viruses did not form new monophyletic clades  
186 within *Picornavirales* (Figure 3) or *Amarillovirales*, *Reovirales*, and *Mononegavirales* (Figure  
187 4). However, within the *Hepivirales*, the recovered viruses formed a distinct monophyletic clade  
188 that is sister to the clade containing *Orthohepivirus* and *Piscihepivirus*.

189 Viral contig lengths ranged from 502 nt to 12,989 nt. Complete and near complete  
190 genomes were recovered from *Picornavirales*, *Mononegavirales*, *Amarillovirales*, and  
191 *Hepelivirales* (Figure 5). The echinoderm picornavirus genomes exhibited three different open  
192 reading frame arrangements, which spatially separated the genome by function according to  
193 replication or encapsidation (Figure 3). The two most conserved protein domains related to  
194 replication were the RdRP (pfam00680) and RNA helicase (pfam00910) domains with many of



195 the genomes also containing BIR (pfam00653), DSRM (pfam00035), Sigma70 (pfam04539),  
196 peptidases (pfam12381), and large tegument protein (PHA03247) domains. The conserved  
197 capsid domains found among the picornavirus genome included: rhv-like (pfam00073), dicistro  
198 VP4 (pfam11492), CRPV (pfam08762), and calici coat (pfam00915) domains (Figure 5). The  
199 recovered hepeviruses and mononegaviruses contigs contained the expected replication proteins  
200 but many lacked complete capsid proteins, indicating they were only near complete genomes  
201 (Figure 5). The flavivirus genome previously discovered in sea cucumber [27] was completed  
202 during our assembly, leading to the extension of a second complete ORF and extending the  
203 genome size from 8,883 to 12,989 nt.

## 204 **Discussion**

205 The most prevalent RNA viruses in echinoderm transcriptomes and RNA viral  
206 metagenomes were picornaviruses which are non-enveloped, single-stranded RNA (+ssRNA)  
207 viruses. The order *Picornavirales* is comprised of eight families (*Caliciviridae*, *Dicistroviridae*,  
208 *Iflaviridae*, *Marnaviridae*, *Picornaviridae*, *Polycipiviridae*, *Secoviridae*, and *Soliniviridae*) and  
209 103 genera and are among the most prevalent and diverse group of viruses found in -omics  
210 surveys of animal and environmental samples [47, 29, 38, 48]. The majority of the echinoderm-  
211 associated picornaviruses grouped into the *Dicistroviridae*, *Iflaviridae*, and *Marnaviridae*  
212 families, but other recovered viruses also comprised novel clades (Figure 3) which supported our  
213 expectation that the extant diversity of echinoderm RNA viruses is under sampled. The  
214 *Marnaviridae* are known to be ocean viroplankton which infect single-celled eukaryotes, such  
215 as phytoplankton and protists, but have also been found from metatranscriptomes from marine  
216 bivalves [48, 49]. It is possible that the *Marnaviridae* we observed infect protists that are  
217 symbionts or transiently associated with echinoderms. Alternatively, the host-range of the

218 *Marnaviridae* family may extend beyond single-celled eukaryotes. The host range of many viral  
219 groups has changed considerably in recent years, and there are examples of host ranges within  
220 RNA viral families that do extend from protists to mammals, such as *Reoviridae* [50, 51]. All  
221 classified species of *Dicistroviridae* and *Iflaviridae* infect arthropods, and have largely been  
222 characterized due to the economic impacts of their pathogenicity though the host range of these  
223 families likely extends far beyond arthropods given their presence in metatranscriptomes from  
224 organisms in the phyla Mollusca, Cnidaria, and Platyhelminthes [31, 48, 52]. The disease  
225 severity from infections of both families ranges from inapparent to lethal, supporting the  
226 possibility that there may be non-pathogenic species infecting echinoderms.

227         Among the rare virosphere of echinoderms, and those that have few marine host  
228 associations, we observed *Martellivirales*, *Nodamuvirales*, *Reovirales*, *Amarillovirales*,  
229 *Mononegavirales*, and *Hepelivirales*. Many of these echinoderm viruses phylogenetically cluster  
230 with established invertebrate-infecting families or genera (i.e. *Nymaviridae* family within  
231 *Mononegavirales* or *Cardorevirus* genus within *Reovirales*) while some represent evolutionary  
232 novel lineages such as the flavivirus discovered from a sea cucumber (Figure 4C) [27]. Currently  
233 it is unclear if members of the rare virosphere infect all classes of echinoderms or if some are  
234 class specific. For example, the reovirus and flavivirus discovered in this study were only found  
235 in sea stars and sea cucumbers, respectively, though we cannot rule out methodological biases  
236 and insufficient sample size as proof of absence, requiring further research. Nevertheless, the  
237 discovery of these viruses significantly expands the host range for many of these groups and  
238 represents the first RNA viruses discovered from crinoids and brittle stars.

239         The vast majority of viruses recovered here, and elsewhere, using transcriptomic and  
240 metatranscriptomic approaches have been positive-sense single-stranded RNA (+ssRNA) [1, 48,

241 53]. This pattern of abundance likely has a basis in biology, but in the case of our dataset, may be  
242 inflated due to our use of transcriptomic data. The selection for polyadenylated transcripts during  
243 RNA-seq library preparation biases towards +ssRNA viruses, like picornaviruses, which have  
244 3'polyadenylated tails [54, 55]. Studies utilizing a metatranscriptomic approach for RNA viral  
245 discovery generally do not find such a highly skewed distribution towards +ssRNA but are  
246 nevertheless the most abundant viral type [1, 29, 38, 48]. By utilizing viral RNA metagenomes  
247 and transcriptomes we have uncovered the fullest diversity of RNA viruses associated with  
248 echinoderms with the datasets available, though we expect future multi-omic efforts to reveal  
249 additional diversity.

250       The greatest difference between the two -omic approaches used in this study for viral  
251 discovery was the total number of viral contigs recovered and contig lengths. Viral RNA  
252 metagenomes generally contained >3 viral contigs per library, which were ~40 % longer,  
253 compared to transcriptomes, which contained 2.2 contigs per library. Additionally, the  
254 proportion of viral reads recovered exhibited a weak correlation with library size for  
255 transcriptomes but not for viral RNA metagenomes (Figure S1B). Thus, despite the efforts to  
256 enrich for viruses in the viral RNA metagenomes, the majority of libraries had a similar percent  
257 of viral reads compared to transcriptomes. Furthermore, these findings indicate that the efficacy  
258 of recovering RNA virus improves with sequencing depth, likely due to the improved assembly  
259 of sequenced found in low abundance.

260       The capacity for viral discovery using -omic approaches has greatly expanded our  
261 understanding of biodiversity and host range, fundamentally shifting the perception of viruses as  
262 solely pathogens to a more nuanced role as commensals or mutualists [1]. Performing a viral  
263 census of hosts, like echinoderms, provides a useful context about the prevalence and association

264 of viruses that can help understand future outbreaks or changes in the susceptibility of marine  
265 animals due to stress from climate change and human activity. The full potential of -omic  
266 approaches to understand the biological or ecological role of the diversity of viruses uncovered  
267 will only be fully realized in partnership with advances in culturing techniques to study the  
268 infection of naïve specimens [56, 57]. Our study provides a comprehensive survey of RNA  
269 viruses present in echinoderm, contrasting the diversity and abundance of RNA viruses between  
270 echinoderm classes and life stages. We hope this information provides valuable context for  
271 advancing our understanding of the role of these viruses in marine hosts and ecosystems.

## 272 **Funding**

273 This work was supported by NSF grants OCE-1537111, OCE-1737127, and OCE-  
274 2049225 awarded to IH. This work was also supported by the Cornell Atkinson Center's  
275 Sustainable Biodiversity Fund and Andrew W. Mellon Student Research Grant awarded to EWJ.

## 276 **Author statements**

277 The authors declare that there are no conflicts of interest.

278

279 **References**

- 280 1. **Shi M, Lin X-D, Tian J-H, Chen L-J, Chen X, et al.** Redefining the invertebrate RNA  
281 virosphere. *Nature* 2016;540:539–543.
- 282 2. **Shi M, Lin X-D, Chen X, Tian J-H, Chen L-J, et al.** The evolutionary history of vertebrate RNA  
283 viruses. *Nature* 2018;556:197–202.
- 284 3. **Bekal S, Domier LL, Gonfa B, McCoppin NK, Lambert KN, et al.** A novel flavivirus in the  
285 soybean cyst nematode. *Journal of General Virology* 2014;95:1272–1280.
- 286 4. **Fauver JR, Grubaugh ND, Krajacich BJ, Weger-Lucarelli J, Lakin SM, et al.** West African  
287 *Anopheles gambiae* mosquitoes harbor a taxonomically diverse virome including new  
288 insect-specific flaviviruses, mononegaviruses, and totiviruses. *Virology* 2016;498:288–299.
- 289 5. **Qin X-C, Shi M, Tian J-H, Lin X-D, Gao D-Y, et al.** A tick-borne segmented RNA virus contains  
290 genome segments derived from unsegmented viral ancestors. *Proceedings of the National  
291 Academy of Sciences* 2014;111:6744–6749.
- 292 6. **Shi M, Lin X-D, Vasilakis N, Tian J-H, Li C-X, et al.** Divergent viruses discovered in  
293 arthropods and vertebrates revise the evolutionary history of the Flaviviridae and related  
294 viruses. *Journal of Virology* 2016;90:659–669.
- 295 7. **Junglen S, Drosten C.** Virus discovery and recent insights into virus diversity in arthropods.  
296 *Current Opinion in Microbiology* 2013;16:507–513.
- 297 8. **Li C-X, Shi M, Tian J-H, Lin X-D, Kang Y-J, et al.** Unprecedented genomic diversity of RNA  
298 viruses in arthropods reveals the ancestry of negative-sense RNA viruses. *elife*  
299 2015;4:e05378.
- 300 9. **Liu S, Chen Y, Bonning BC.** RNA virus discovery in insects. *Current Opinion in Insect Science*  
301 2015;8:54–61.
- 302 10. **Remnant EJ, Shi M, Buchmann G, Blacquièrre T, Holmes EC, et al.** A diverse range of novel  
303 RNA viruses in geographically distinct honey bee populations. *Journal of virology*  
304 2017;91:e00158-17.
- 305 11. **Käfer S, Paraskevopoulou S, Zirkel F, Wieseke N, Donath A, et al.** Re-assessing the diversity  
306 of negative strand RNA viruses in insects. *PLoS Pathogens* 2019;15:e1008224.
- 307 12. **Wu H, Pang R, Cheng T, Xue L, Zeng H, et al.** Abundant and Diverse RNA viruses in insects  
308 revealed by RNA-seq analysis: ecological and evolutionary implications. *Msystems*  
309 2020;5:e00039-20.
- 310 13. **Wang YN, Chang YQ, Lawrence JM.** Chapter 12 - Disease in Sea Urchins. In: Lawrence JM  
311 (editor). *Developments in Aquaculture and Fisheries Science*. Elsevier. pp. 179–186.

- 312 14. **Hewson I, Sullivan B, Jackson EW, Xu Q, Long H, et al.** Perspective: Something Old,  
313 Something New? Review of Wasting and Other Mortality in Asteroidea (Echinodermata).  
314 *Frontiers in Marine Science* 2019;6:406.
- 315 15. **Slater M.** Use and Exploitation of Sea Cucumbers. In: *Echinoderm Aquaculture*. John Wiley  
316 & Sons, Ltd. pp. 57–73.
- 317 16. **Sun J, Chiang F-S.** Use and Exploitation of Sea Urchins. In: *Echinoderm Aquaculture*. John  
318 Wiley & Sons, Ltd. pp. 25–45.
- 319 17. **Deng H, Zhou Z, Wang N, Liu C.** The syndrome of sea cucumber (*Apostichopus japonicus*)  
320 infected by virus and bacteria. *Virologica Sinica* 2008;23:63–67.
- 321 18. **Liu H, Zheng F, Sun X, Hong X, Dong S, et al.** Identification of the pathogens associated with  
322 skin ulceration and peristome tumescence in cultured sea cucumbers *Apostichopus*  
323 *japonicus* (Selenka). *Journal of Invertebrate Pathology* 2010;105:236–242.
- 324 19. **Gudenkauf BM, Eaglesham JB, Aragundi WM, Hewson I.** Discovery of urchin-associated  
325 densoviruses (family Parvoviridae) in coastal waters of the Big Island, Hawaii. *Journal of*  
326 *General Virology* 2014;95:652–658.
- 327 20. **Jackson EW, Bistolas KS, Button JB, Hewson I.** Novel Circular Single-Stranded DNA Viruses  
328 among an Asteroid, Echinoid and Holothurian (Phylum: Echinodermata). *PloS One*  
329 2016;11:e0166093.
- 330 21. **Hewson I, Aquino CA, DeRito CM.** Virome variation during sea star wasting disease  
331 progression in *Pisaster ochraceus* (Asteroidea, Echinodermata). *Viruses* 2020;12:1332.
- 332 22. **Hewson I, Button JB, Gudenkauf BM, Miner B, Newton AL, et al.** Densovirus associated  
333 with sea-star wasting disease and mass mortality. *Proceedings of the National Academy of*  
334 *Sciences* 2014;111:17278–17283.
- 335 23. **Bucci C, Francoeur M, McGreal J, Smolowitz R, Zazueta-Novoa V, et al.** Sea Star Wasting  
336 Disease in *Asterias forbesi* along the Atlantic Coast of North America. *PLoS One*  
337 2017;12:e0188523.
- 338 24. **Hewson I, Bistolas KS, Quijano Cardé EM, Button JB, Foster PJ, et al.** Investigating the  
339 complex association between viral ecology, environment, and northeast Pacific sea star  
340 wasting. *Frontiers in Marine Science* 2018;5:77.
- 341 25. **Jackson EW, Pepe-Ranney C, Johnson MR, Distel DL, Hewson I.** A Highly Prevalent and  
342 Pervasive Densovirus Discovered among Sea Stars from the North American Atlantic Coast.  
343 *Applied and Environmental Microbiology* 2020;86:e02723-19.

- 344 26. **Jackson EW, Wilhelm RC, Johnson MR, Lutz HL, Danforth I, et al.** Diversity of Sea Star-  
345 Associated Densoviruses and Transcribed Endogenous Viral Elements of Densovirus Origin.  
346 *Journal of Virology* 2020;95:e01594-20.
- 347 27. **Hewson I, Johnson MR, Tibbetts IR.** An unconventional flavivirus and other RNA viruses in  
348 the sea cucumber (Holothuroidea; Echinodermata) virome. *Viruses* 2020;12:1057.
- 349 28. **Shi M, Zhang Y-Z, Holmes EC.** Meta-transcriptomics and the evolutionary biology of RNA  
350 viruses. *Virus Research* 2018;243:83–90.
- 351 29. **Wu H, Pang R, Cheng T, Xue L, Zeng H, et al.** Abundant and Diverse RNA viruses in insects  
352 revealed by RNA-seq analysis: ecological and evolutionary implications. *Msystems*;5.
- 353 30. **Parry R, Asgari S.** Discovery of novel crustacean and cephalopod flaviviruses: insights into  
354 the evolution and circulation of flaviviruses between marine invertebrate and vertebrate  
355 hosts. *Journal of Virology* 2019;93:e00432-19.
- 356 31. **Cheng R-L, Li X-F, Zhang C-X.** Novel Dicistroviruses in an Unexpected Wide Range of  
357 Invertebrates. *Food and Environmental Virology* 2021;1–9.
- 358 32. **Zhang Y-Z, Chen Y-M, Wang W, Qin X-C, Holmes EC.** Expanding the RNA virosphere by  
359 unbiased metagenomics. *Annual Review of Virology* 2019;6:119–139.
- 360 33. **Bolger AM, Lohse M, Usadel B.** Trimmomatic: A flexible trimmer for Illumina sequence  
361 data. *Bioinformatics* 2014;30:2114–2120.
- 362 34. **Gordon A, Hannon GJ.** Fastx-toolkit. *FASTQ/A short-reads preprocessing tools*  
363 2010;5:[http://hannonlab.cshl.edu/fastx\\_toolkit](http://hannonlab.cshl.edu/fastx_toolkit).
- 364 35. **Grabherr MG, Haas BJ, Yassour M, Levin JZ, Thompson DA, et al.** Full-length transcriptome  
365 assembly from RNA-Seq data without a reference genome. *Nature Biotechnology*  
366 2011;29:644–652.
- 367 36. **Bushnell B.** BBTools software package. URL <http://sourceforge.net/projects/bbmap>  
368 2014;578:579.
- 369 37. **Bankevich A, Nurk S, Antipov D, Gurevich AA, Dvorkin M, et al.** SPAdes: a new genome  
370 assembly algorithm and its applications to single-cell sequencing. *Journal of computational*  
371 *biology* 2012;19:455–477.
- 372 38. **Wolf YI, Silas S, Wang Y, Wu S, Bocek M, et al.** Doubling of the known set of RNA viruses by  
373 metagenomic analysis of an aquatic virome. *Nature Microbiology* 2020;5:1262–1270.
- 374 39. **Buchfink B, Xie C, Huson DH.** Fast and sensitive protein alignment using DIAMOND. *Nature*  
375 *Methods* 2014;12:59–60.

- 376 40. **Bushnell B.** BBMap: A Fast, Accurate, Splice-Aware Aligner.
- 377 41. **Gerlt JA, Bouvier JT, Davidson DB, Imker HJ, Sadkhin B, et al.** Enzyme function initiative-  
378 enzyme similarity tool (EFI-EST): a web tool for generating protein sequence similarity  
379 networks. *Biochimica Et Biophysica Acta (BBA)-Proteins and Proteomics* 2015;1854:1019–  
380 1037.
- 381 42. **Shannon P, Markiel A, Ozier O, Baliga NS, Wang JT, et al.** Cytoscape: a software  
382 environment for integrated models of biomolecular interaction networks. *Genome research*  
383 2003;13:2498–2504.
- 384 43. **Katoh K, Standley DM.** MAFFT multiple sequence alignment software version 7:  
385 improvements in performance and usability. *Molecular biology and evolution* 2013;30:772–  
386 780.
- 387 44. **Guindon S, Dufayard J-F, Lefort V, Anisimova M, Hordijk W, et al.** New algorithms and  
388 methods to estimate maximum-likelihood phylogenies: assessing the performance of  
389 PhyML 3.0. *Systematic biology* 2010;59:307–321.
- 390 45. **Rambaut A, Drummond A.** FigTree: Tree figure drawing tool, version 1.2. 2. *Institute of*  
391 *Evolutionary Biology, University of Edinburgh.*
- 392 46. **Paraskevopoulou S, Käfer S, Zirkel F, Donath A, Petersen M, et al.** Viromics of extant insect  
393 orders unveil the evolution of the flavi-like superfamily. *Virus Evolution* 2021;7:veab030.
- 394 47. **Culley AI, Lang AS, Suttle CA.** High diversity of unknown picorna-like viruses in the sea.  
395 *Nature* 2003;424:1054–1057.
- 396 48. **Zhang Y-Y, Chen Y, Wei X, Cui J.** Viromes in marine ecosystems reveal remarkable  
397 invertebrate RNA virus diversity. *Sci China Life Sci.* Epub ahead of print 17 June 2021. DOI:  
398 10.1007/s11427-020-1936-2.
- 399 49. **Lang AS, Vlok M, Culley AI, Suttle CA, Takao Y, et al.** ICTV Virus Taxonomy Profile:  
400 Marnaviridae 2021. *Journal of General Virology* 2021;102:001633.
- 401 50. **Brussaard CPD, Noordeloos AAM, Sandaa R-A, Haldal M, Bratbak G.** Discovery of a dsRNA  
402 virus infecting the marine photosynthetic protist *Micromonas pusilla*. *Virology*  
403 2004;319:280–291.
- 404 51. **Day JM.** The diversity of the orthoreoviruses: molecular taxonomy and phylogenetic divides.  
405 *Infection, Genetics and Evolution* 2009;9:390–400.
- 406 52. **Valles SM, Chen Y, Firth AE, Guérin DMA, Hashimoto Y, et al.** ICTV virus taxonomy profile:  
407 Iflaviridae. *The Journal of General Virology* 2017;98:527.



- 408 53. **Guo L, Lu X, Liu X, Li P, Wu J, et al.** Metatranscriptomic Analysis Reveals the Virome and  
409 Viral Genomic Evolution of Medically Important Mites. *Journal of Virology*;95:e01686-20.
- 410 54. **Steil BP, Kempf BJ, Barton DJ.** Poly(A) at the 3' End of Positive-Strand RNA and VPg-Linked  
411 Poly(U) at the 5' End of Negative-Strand RNA Are Reciprocal Templates during Replication  
412 of Poliovirus RNA. *Journal of Virology* 2010;84:2843–2858.
- 413 55. **Gann ER, Kang Y, Dyhrman ST, Gobler CJ, Wilhelm SW.** Metatranscriptome Library  
414 Preparation Influences Analyses of Viral Community Activity During a Brown Tide Bloom.  
415 *Frontiers in Microbiology* 2021;12:1126.
- 416 56. **Canuti M, van der Hoek L.** Virus discovery: are we scientists or genome collectors? *Trends*  
417 *in microbiology* 2014;22:229–231.
- 418 57. **Greninger AL.** A decade of RNA virus metagenomics is (not) enough. *Virus Research*  
419 2018;244:218–229.

420

421

422

423

424

425

426

427

428

429

430

431

432

433

434 **Figure 1: Summary of viral contigs discovered from echinoderm transcriptomes** (A) The  
435 number of transcriptomes downloaded from NCBI ordered by echinoderm class that were  
436 processed for viral discovery. (B) Top bars display the total number of viral contigs discovered  
437 separated by echinoderm class and life stage. Bottom bars display total number of transcriptomes  
438 separated by echinoderm class and life stage (C) Percentage of viral reads in transcriptomes by  
439 life stage. NS = non-significant.  
440  
441

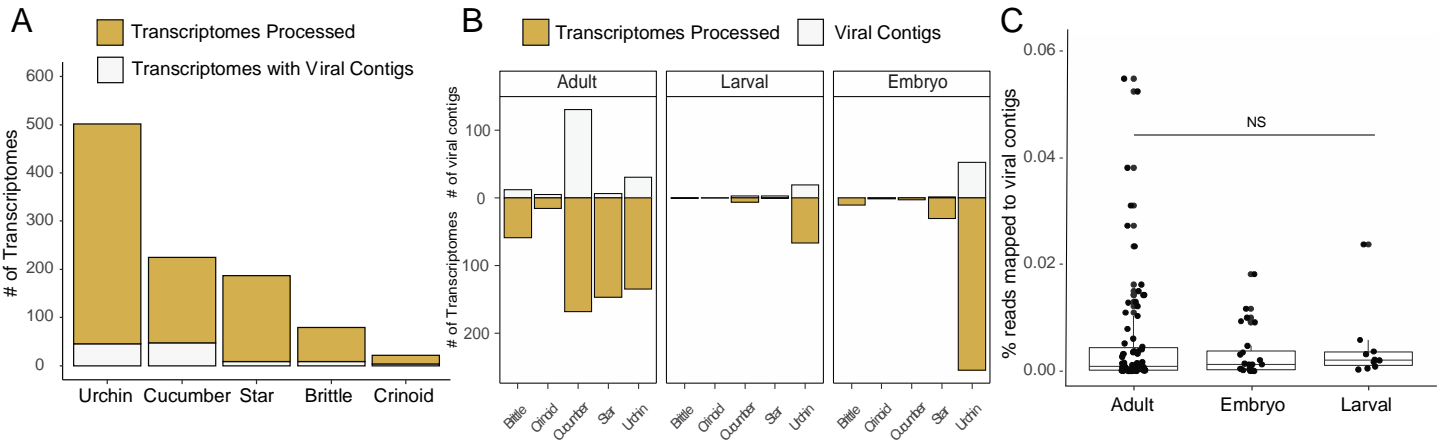

442  
443  
444  
445  
446  
447  
448  
449  
450  
451  
452  
453  
454  
455  
456  
457  
458  
459  
460  
461  
462  
463  
464  
465  
466  
467

468 **Figure 2: Picornaviruses are the dominant viral order found in echinoderms.** (A) Colored circles represent viral sequences discovered from echinoderm transcriptomes and RNA viral  
469 metagenomes. White circles are viral genomes taken from NCBI. (B) The bar chart displays the  
470 number of echinoderm viruses discovered from each viral order.  
471

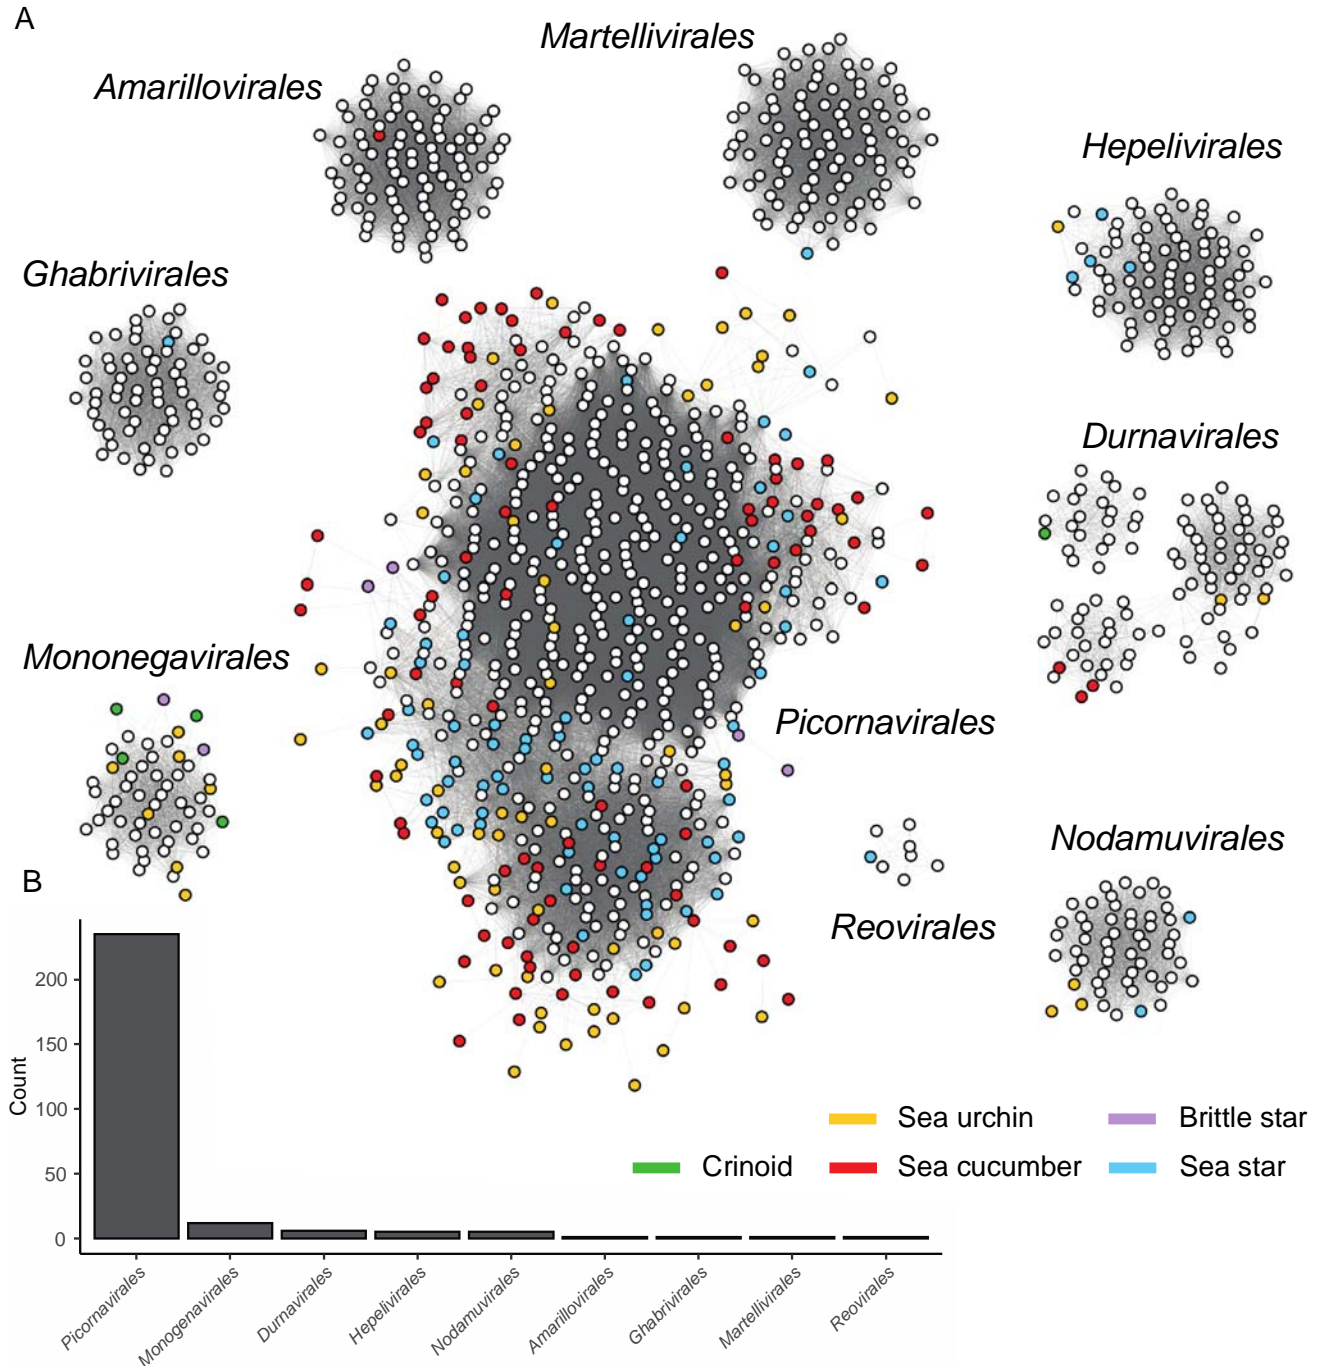

472  
473  
474  
475

476 **Figure 3: Echinoderm picornaviruses are broadly distributed across the *Picornavirales***  
 477 **phylogeny.** Tips are colored by taxonomic family with orange circles representing echinoderm  
 478 picornaviruses. Genome architectures of complete and near complete genomes recovered from  
 479 assemblies displayed. Genomes are drawn approximate to scale in a 5' to 3' direction. Open  
 480 reading frames denoted by boxes and colored by general function. Asterisk represents an  
 481 incomplete open reading frame. Animal icons represent the echinoderm order the viral contig is  
 482 associated with.  
 483

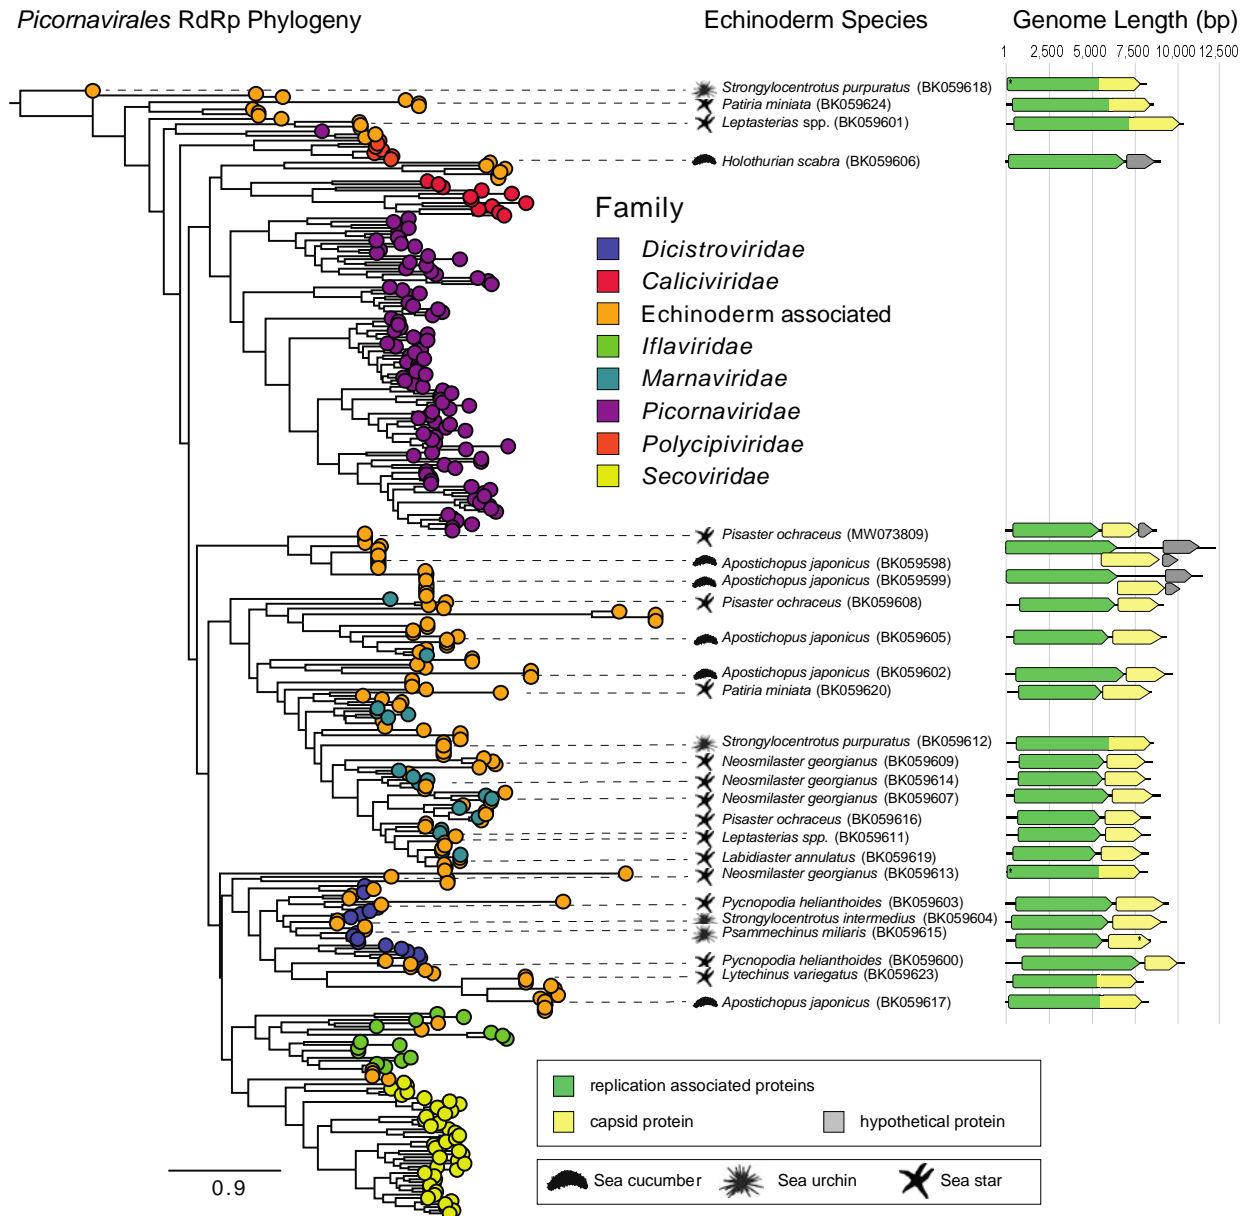

484 **Figure 4: Phylogenetic placement of echinoderm viruses from *Reovirales*, *Mononegavirales*,**  
 485 ***Amarillovirales*, and *Hepevirales*.** Tips are colored by taxonomic family or genus with black  
 486 circles representing echinoderm viruses. Genome architectures of complete and near complete  
 487 genomes recovered from assemblies displayed. Genomes are drawn approximate to scale in a 5'  
 488 to 3' direction. Open reading frames denoted by boxes and colored by general function. Asterisk  
 489 represents an incomplete open reading frame and a question mark denotes potentially incomplete

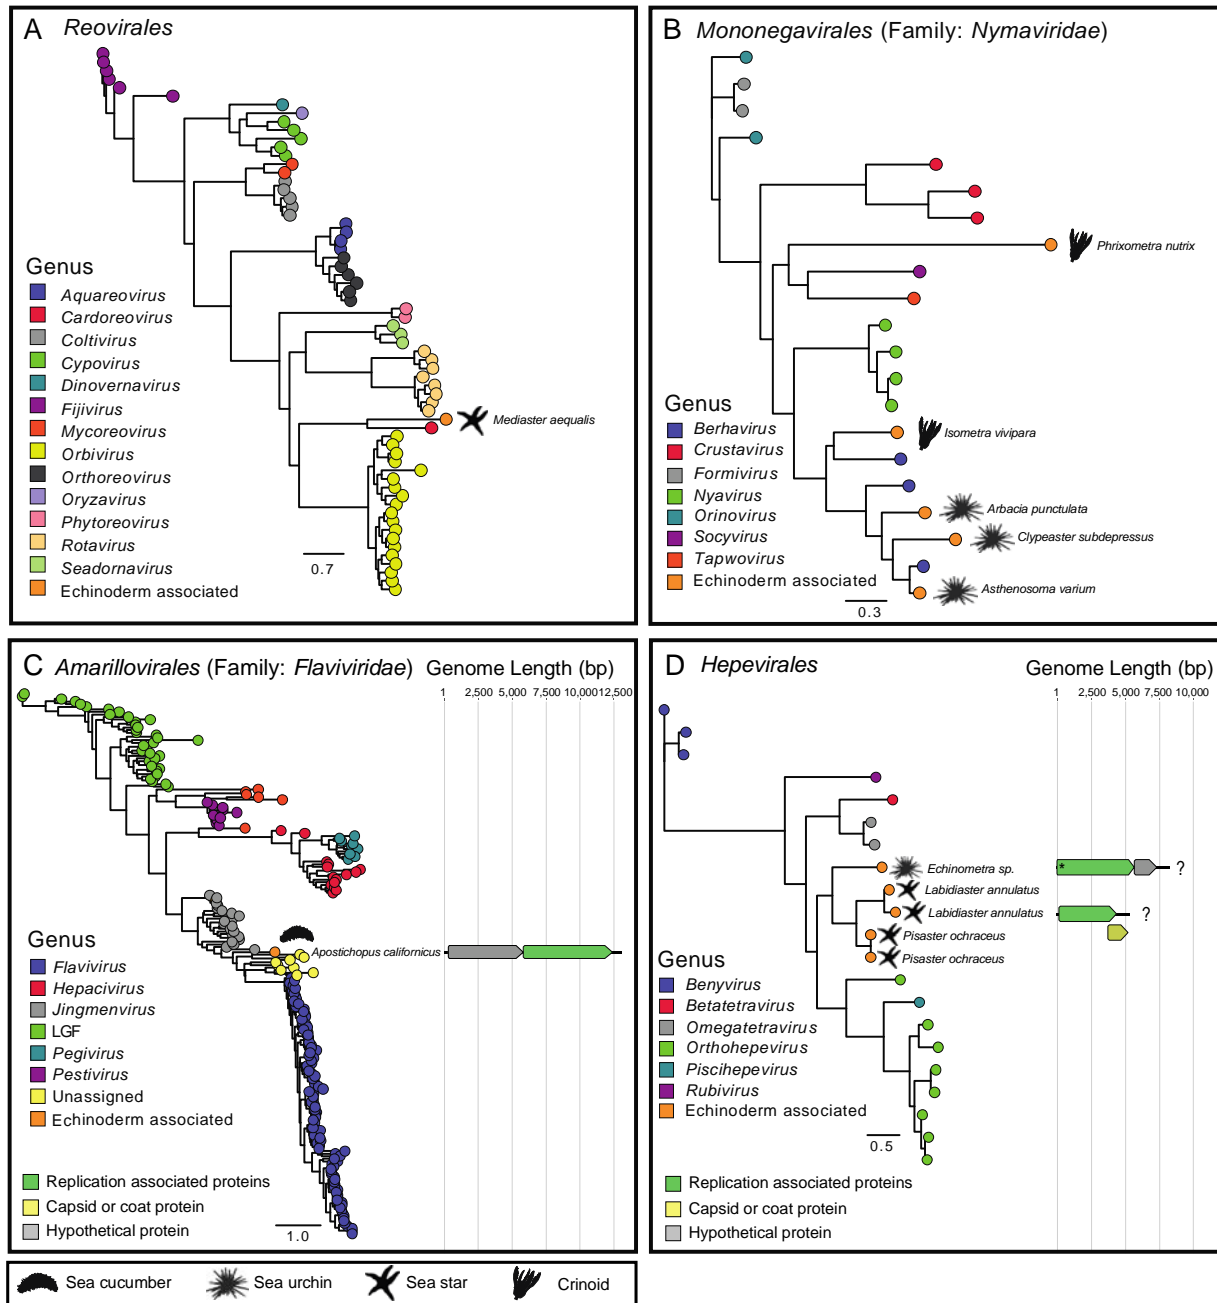

490 genome. Animal icons represent the echinoderm order the viral contig is associated with.

491

492 **Figure 5: Genome architectures and comparison of complete or near complete genomes**  
 493 **recovered from assemblies.** Genomes are drawn approximate to scale in a 5' to 3' direction.  
 494 Open reading frames denoted by boxes and colored regions represent conserved protein domains.  
 495 Asterisk represents an incomplete open reading frame and question marks indicate missing open  
 496 reading frames that would complete the genome. Animal icons represent the echinoderm order  
 497 the viral contig is associated with.

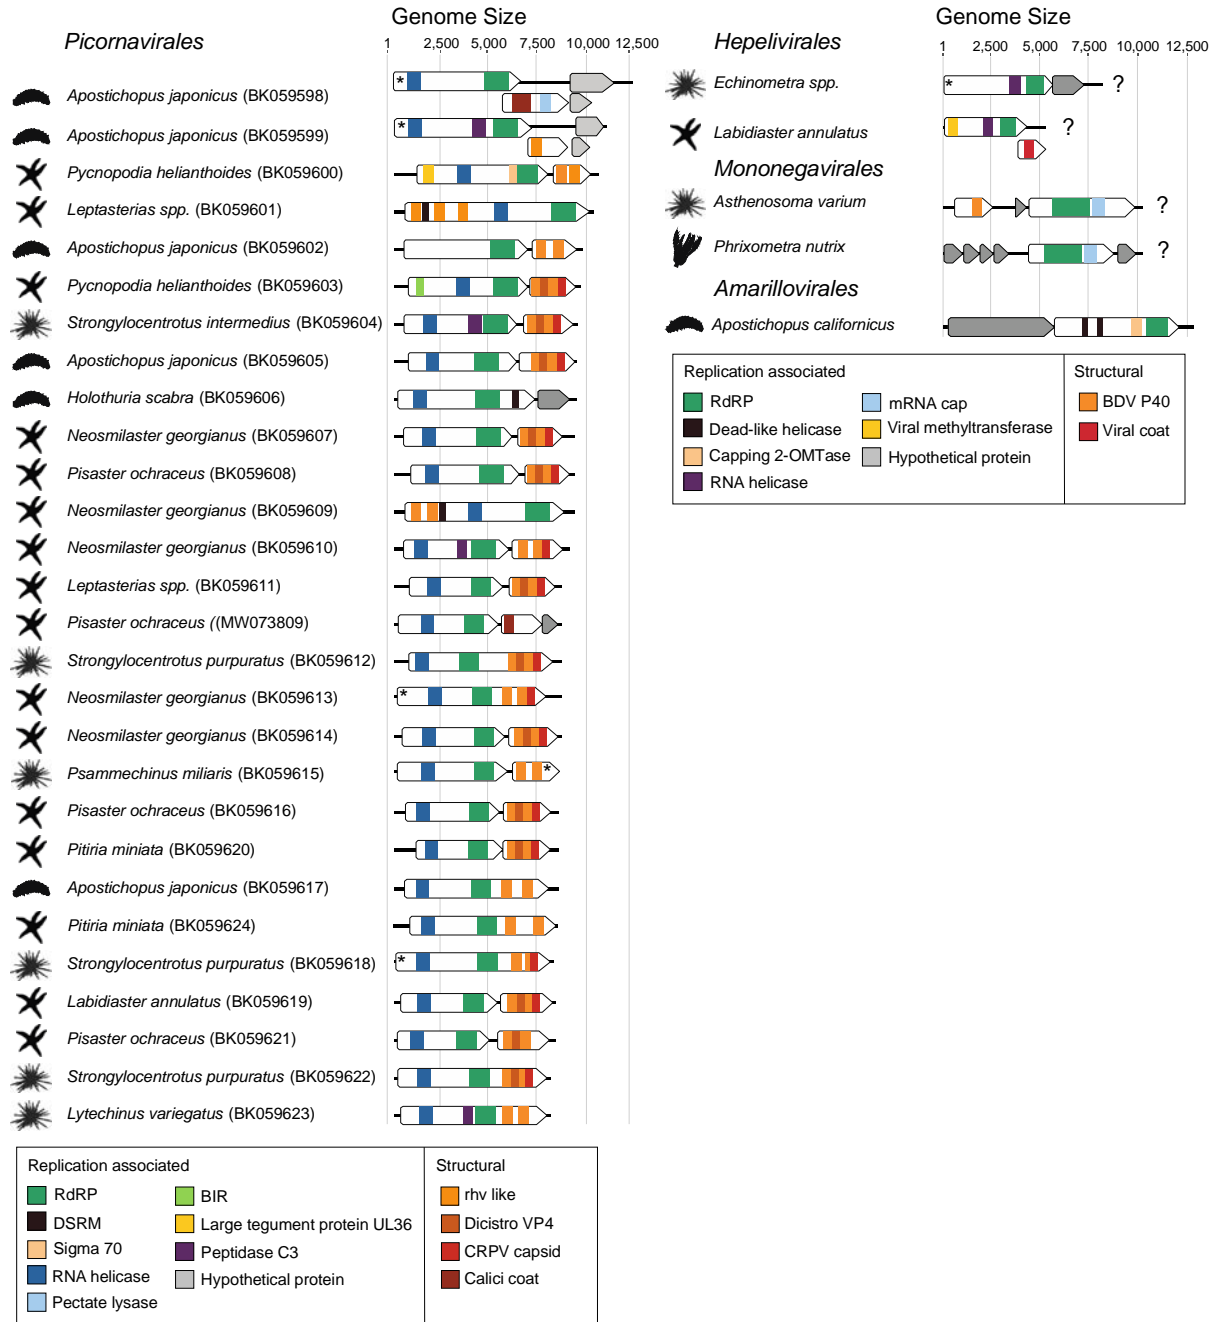

498

499

500 **Figure S1: Summary statistics of viral discovery from short read libraries.** (A) The  
501 distribution of viral contig lengths between RNA viral metagenomes and transcriptomes. (B)  
502 Total number of viral contigs discovered in RNA viral metagenomes and host transcriptomes.  
503 (C) Pearson's correlations of total reads in a given library and total viral sequences in the same  
504 library.

505  
506

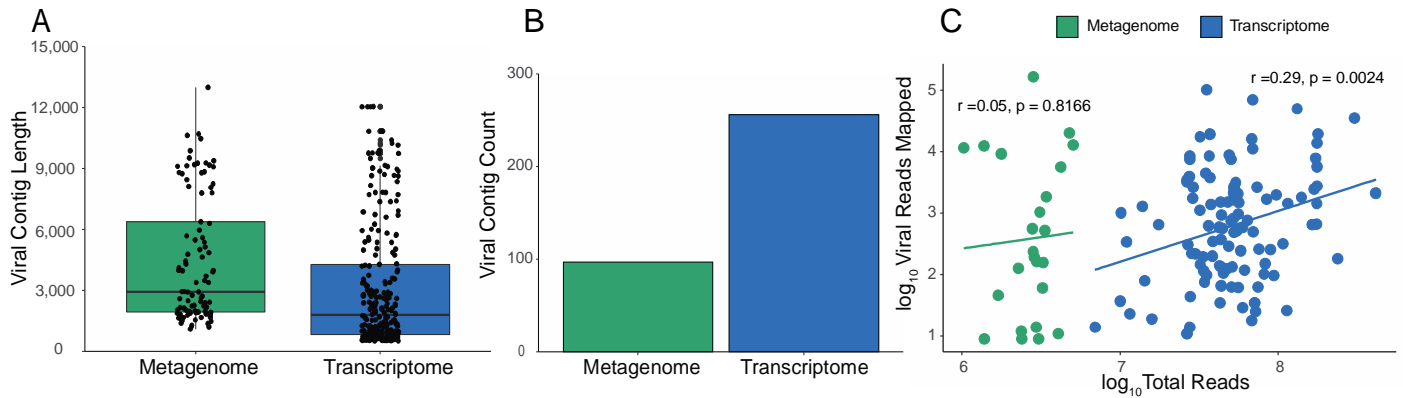

507  
508  
509  
510  
511  
512  
513  
514  
515  
516  
517  
518  
519  
520  
521  
522  
523  
524  
525  
526  
527  
528  
529  
530  
531  
532  
533
